# Supplementary material
Source: PubMed Central journal article supplement (PMC8746868)
Supplement: mmc1.pdf [file mmc1.pdf]

## Supplementary Materials

| <b>Country</b>  | <b>Trade Balance as % of GDP</b> | <b>Gross Tourism Receipts as % of GDP</b> |
|-----------------|----------------------------------|-------------------------------------------|
| Fiji            | -21.5                            | 38.9                                      |
| FSM             | -33.3                            | 13.0                                      |
| Palau           | -50.2                            | 43.3                                      |
| PNG             | 30.3                             | 16.1                                      |
| Solomon Islands | -31.8                            | 12.5                                      |
| Tonga           | -45.2                            | 21.1                                      |
| Tuvalu          | -43.5                            | 19.3                                      |

Source: Pacific Community (<https://sdd.spc.int/disasters-data/covid-19>)
